# Supplementary figures and images for: Proving sequence aligners can guarantee accuracy in almost O ( m log n ) time through an average-case analysis of the seed-chain-extend heuristic
Source: HighWire-hosted journal article supplement (doi:10.1101/gr.277637.122), 2023-03-29

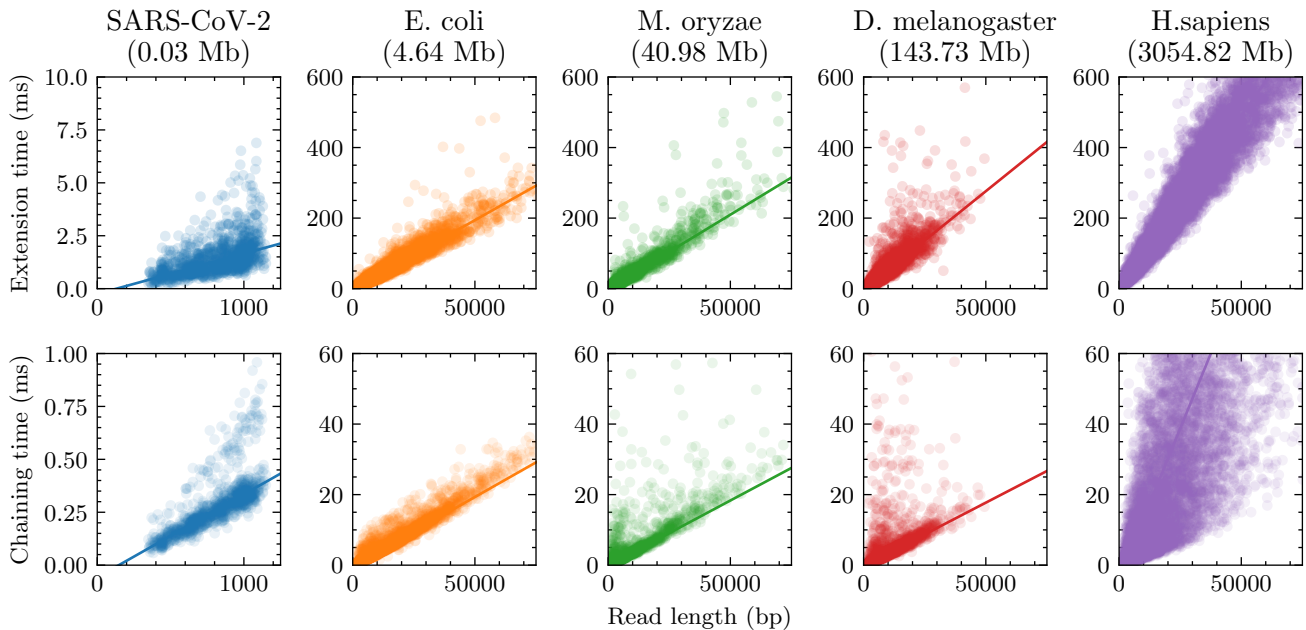

Supplement: Supplemental_Code.zip [file combined_ext_plot.pdf › sce-aligner-main/sce-aligner-main/figures/combined_ext_plot.pdf]

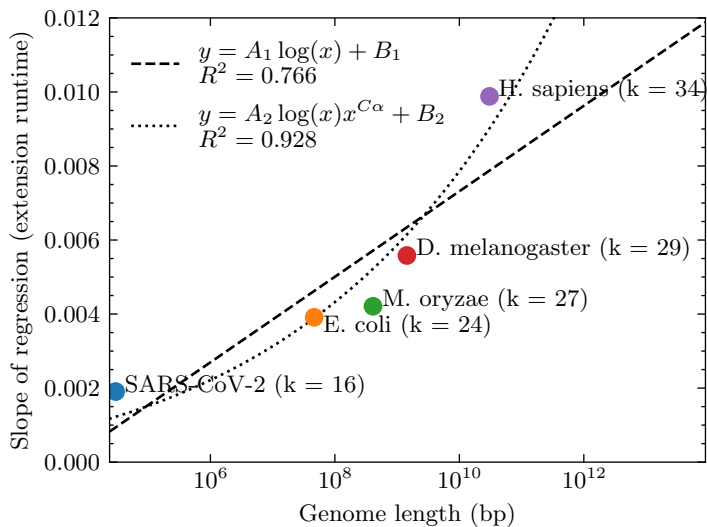

Supplement: Supplemental_Code.zip [file log_coeff_plot_ext.pdf › sce-aligner-main/sce-aligner-main/figures/log_coeff_plot_ext.pdf]

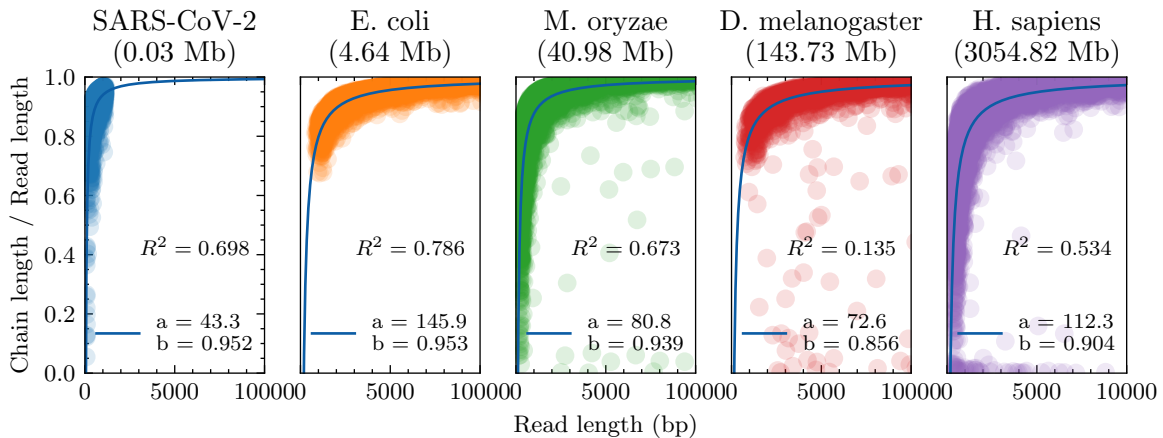

Supplement: Supplemental_Code.zip [file nanopore_recov.pdf › sce-aligner-main/sce-aligner-main/figures/nanopore_recov.pdf]
